# Supplementary material for: Chloroplasts as ingredients for food: a review
Source: Royal Society of Chemistry journal article supplement (doi:10.1039/d5fo03797b), 2026-06-04
Supplement: d5fo03797b1.pdf [file d5fo03797b1.pdf]

## Supplementary Material: Composition comparison of leaves from different sources

### A. Sample moisture content and dry weight

The average moisture content ( $100\text{mg}^{-1}$ ) and dry weight fraction (% DW) data for leaf Chlorophyll Rich Fraction (CRF) and whole leaf materials across four plant types: spinach, kale, nettles, and grass

|                                                    | Leaf CRF (% DW) <sup>1 ^</sup> |          |          |          | Whole Leaf Materials (% DW) <sup>1 *</sup> |          |          |          |
|----------------------------------------------------|--------------------------------|----------|----------|----------|--------------------------------------------|----------|----------|----------|
|                                                    | Spinach                        | Kale     | Nettles  | Grass    | Spinach                                    | Kale     | Nettles  | Grass    |
| Moisture Content ( $100\text{mg}^{-1}$ FW)         | 79 ± 0.3                       | 82 ± 0.4 | 70 ± 0.7 | 72 ± 0.5 | 94 ± 0.2                                   | 82 ± 0.5 | 77 ± 0.8 | 80 ± 1.2 |
| Dry Weight (DW) Fraction ( $100\text{mg}^{-1}$ FW) | 21                             | 18       | 30       | 28       | 6                                          | 18       | 23       | 20       |

### B. Broad Composition

The broad composition of different samples for average protein, lipid, carbohydrate (CHO) and ash content, including the whole-leaf and chlorophyll Rich Fraction (CRF) of four plants (Spinach, Kale, Nettles and Grass) and three commercial products/ preparations

|         | Leaf CRF (% DW) <sup>1</sup> |            |            |            | Whole Leaf Materials (% DW) <sup>1</sup> |            |            |            | Commercial Products (% DW)                        |                                                         |                                                         |
|---------|------------------------------|------------|------------|------------|------------------------------------------|------------|------------|------------|---------------------------------------------------|---------------------------------------------------------|---------------------------------------------------------|
|         | Spinach                      | Kale       | Nettles    | Grass      | Spinach                                  | Kale       | Nettles    | Grass      | Matcha or MacchaTea <sup>2-</sup><br><sub>5</sub> | <i>Chlorella vulgaris</i> <sup>6-</sup><br><sub>8</sub> | Spirulina (ssp. <i>Arthrospira</i> )<br><sub>9,12</sub> |
| Protein | 42.6 ± 0.1                   | 44.1 ± 2.7 | 18.3 ± 1.1 | 30.2 ± 0.2 | 35.3 ± 4.5                               | 36.6 ± 4.8 | 28.0 ± 0.3 | 23.1 ± 1.2 | 17.3 - 29.6                                       | 37.6 - 58                                               | 55-70                                                   |
| Lipid   | 36.9 ± 1.3                   | 36.1 ± 1.7 | 29.8 ± 1.5 | 30.4 ± 2.7 | 19.3 ± 1.6                               | 17.0 ± 0.6 | 13.4 ± 0.4 | 12.5 ± 0.3 | 7.3                                               | 3.6-58.0                                                | 6.0-9.0                                                 |
| CHO     | 16.4                         | 17.4       | 49.8       | 37.6       | 26.6                                     | 31.9       | 42.2       | 55.6       | 38.5 - 56.1**                                     | 12-41.6                                                 | 15-25                                                   |
| Ash     | 4.1 ± 0.0                    | 2.4 ± 0.0  | 2.1 ± 0.0  | 1.8 ± 0.0  | 18.8 ± 0.2                               | 14.5 ± 0.1 | 16.4 ± 0.0 | 8.8 ± 2.5  | 4.0-8.0                                           | 6.4                                                     | 7.0-13.0                                                |

### C. Mineral composition

The average mineral composition of ten different samples for nine minerals of dietary importance; including chloroplast rich fractions (CRFs), whole leaf materials and commercial algal preparations

|    | Leaf CRFs (mg 100 g <sup>-1</sup> ) <sup>1</sup> |            |            |            | Whole Leaf Materials (mg 100 g <sup>-1</sup> ) <sup>1</sup> |            |            |            | Algal Preparations (mg 100 g <sup>-1</sup> ) |                                                             |
|----|--------------------------------------------------|------------|------------|------------|-------------------------------------------------------------|------------|------------|------------|----------------------------------------------|-------------------------------------------------------------|
|    | Spinach                                          | Kale       | Nettles    | Grass      | Spinach                                                     | Kale       | Nettles    | Grass      | <i>Chlorella vulgaris</i> <sup>6-8</sup>     | <i>Spirulina</i> (ssp. <i>Arthrospira</i> ) <sup>9,12</sup> |
| Na | 21 ± 5                                           | 39 ± 11    | 63 ± 4     | 44 ± 2     | 64 ± 11                                                     | 9 ± 3      | 21 ± 11    | 32 ± 25    | 1350                                         | 250–900                                                     |
| Mg | 337 ± 24                                         | 322 ± 1    | 396 ± 18   | 232 ± 28   | 398 ± 3                                                     | 372 ± 11   | 737 ± 30   | 244 ± 31   | 340 - 440                                    | 195–400                                                     |
| P  | 298 ± 4                                          | 628 ± 11   | 370 ± 54   | 436 ± 9    | 87 ± 4                                                      | 756 ± 6    | 413 ± 47   | 613 ± 2    | 960 - 1760                                   | 118–1000                                                    |
| K  | 1196 ± 68                                        | 518 ± 95   | 872 ± 64   | 1195 ± 234 | 12949 ± 403                                                 | 4169 ± 95  | 2947 ± 73  | 4383 ± 417 | 50 - 2150                                    | 1360–1600                                                   |
| Ca | 677 ± 15                                         | 920 ± 30   | 1736 ± 11  | 354 ± 4    | 2364 ± 0                                                    | 2601 ± 163 | 6249 ± 188 | 323 ± 90   | 160 - 590                                    | 120–1500                                                    |
| Mn | 7.7 ± 0.4                                        | 6.5 ± 0.7  | 7.9 ± 0.4  | 12.0 ± 3.4 | 5.1 ± 0.1                                                   | 2.5 ± 0.0  | 14.1 ± 0.3 | 32.8 ± 2.9 | 400                                          | 1.9–5                                                       |
| Fe | 31.4 ± 3.1                                       | 25.7 ± 9.1 | 42.1 ± 12  | 37.0 ± 0.6 | 16.0 ± 0.4                                                  | 12.2 ± 0.1 | 21.1 ± 0.5 | 12.1 ± 3.1 | 200 - 680                                    | 28.5–170                                                    |
| Cu | 2.0 ± 0.1                                        | 0.5 ± 0.1  | 1.0 ± 0.1  | 1.1 ± 0.4  | 1.7 ± 0.0                                                   | 0.5 ± 0.0  | 1.0 ± 0.0  | 1.2 ± 0.1  | 190                                          | 1.2-6.1                                                     |
| Zn | 3.60 ± 0.5                                       | 3.60 ± 0.2 | 3.60 ± 0.2 | 4.00 ± 0.7 | 14.90 ± 0.6                                                 | 2.40 ± 0.0 | 3.10 ± 0.2 | 3.80 ± 0.5 | 550                                          | 2–7                                                         |

#### D. Vitamin composition

The average vitamin composition of ten different samples for four key vitamins; including chloroplast-rich fractions (CRFs), whole leaf materials and commercial algal preparations

|                                   | Leaf CRFs (mg 100 g <sup>-1</sup> ) <sup>1</sup> |          |          |          | Whole Leaf Materials (mg 100 g <sup>-1</sup> ) <sup>1</sup> |          |          |          | Algal Preparations (mg 100 g <sup>-1</sup> ) |                                                             |
|-----------------------------------|--------------------------------------------------|----------|----------|----------|-------------------------------------------------------------|----------|----------|----------|----------------------------------------------|-------------------------------------------------------------|
|                                   | Spinach                                          | Kale     | Nettles  | Grass    | Spinach                                                     | Kale     | Nettles  | Grass    | <i>Chlorella vulgaris</i> <sup>11</sup>      | <i>Spirulina</i> (ssp. <i>Arthrospira</i> ) <sup>9,12</sup> |
| Provitamin A (i.e. beta carotene) | 336 ± 10                                         | 247 ± 10 | 330 ± 0  | 255 ± 10 | 85 ± 10                                                     | 86 ± 10  | 97 ± 10  | 75 ± 0   | 25 - 500 <sup>^^</sup>                       | 177 - 580                                                   |
| E (tocopherol)                    | 62 ± 0                                           | 22 ± 0   | 51 ± 0   | 12 ± 0   | 10 ± 0                                                      | 10 ± 0   | 14 ± 0.0 | 6 ± 0.0  | 3.0 - 45                                     | 5 - 100                                                     |
| K (phylloquinone)                 | -                                                | -        | -        | -        | -                                                           | -        | -        | -        | 0.3 - 4                                      | 0.0022 - 0.0286                                             |
| C (ascorbic acid)                 | 81 ± 20                                          | 112 ± 20 | 112 ± 30 | 112 ± 22 | 250-710 <sup>1,10</sup>                                     | 439 ± 42 | 214 ± 37 | 684 ± 36 | 7 - 1500                                     | 0.9 - 11.3                                                  |

<sup>^</sup>As measured after homogenised, filtered and freeze dried

<sup>\*</sup>As measured after freeze drying and then grinding with mortar and pestle

<sup>\*\*</sup> Carbohydrates + Total Fibre Content

<sup>^^</sup> total carotenoids

## References

1. Gedi MA, Briars R, Yuseli F, Zainol N, Darwish R, Salter AM, Gray DA. Component analysis of nutritionally rich chloroplasts: recovery from conventional and unconventional green plant species. *Journal of Food Science and Technology*. 2017 Aug;54(9):2746-57.
2. Kika J, Jakubczyk K, Ligenza A, Maciejewska-Markiewicz D, Szymczykowska K, Janda-Milczarek K. Matcha green tea: Chemical composition, phenolic acids, caffeine and fatty acid profile. *Foods*. 2024 Apr 11;13(8):116
3. Koláčková T, Sumczynski D, Minařík A, Yalçın E, Orsavová J. The effect of in vitro digestion on matcha tea (*Camellia sinensis*) active components and antioxidant activity. *Antioxidants*. 2022 Apr 30;11(5):889.
4. Saito A, Okada E, Matsumoto M, Takimoto H. Impact of updated standard tables of food composition on nutrient intakes in Japan. *Journal of Food Composition and Analysis*. 2019 Jun 1;79:5-11.
5. Fukuda K, Tategai K, Aoki M, Otsuki H, Aoi W. Matcha Green Tea Promotes Training-induced Anabolic Response of Skeletal Muscle in Mice. *Journal of Food Research*. 2026;15(1).
6. Jui TJ, Tasnim A, Islam SR, Manjur OH, Hossain MS, Tasnim N, Karmakar D, Hasan MR, Karim MR. Optimal growth conditions to enhance *Chlorella vulgaris* biomass production in indoor phyto tank and quality assessment of feed and culture stock. *Heliyon*. 2024 Jun 15;10(11).
7. Heo Y, Kim MY, Cho JY. *Chlorella vulgaris*, a representative edible algae as integrative and alternative medicine. *Integrative Medicine Research*. 2025 Aug 17:101228.
8. Safi C, Zebib B, Merah O, Pontalier PY, Vaca-Garcia C. Morphology, composition, production, processing and applications of *Chlorella vulgaris*: A review. *Renewable and sustainable energy reviews*. 2014 Jul 1;35:265-78.
9. Podgórska-Kryszczuk I. Spirulina—An invaluable source of macro- and micronutrients with broad biological activity and application potential. *Molecules*. 2024 Nov 15;29(22):5387.
10. Bergquist SÅ, Gertsson UE, Olsson ME. Influence of growth stage and postharvest storage on ascorbic acid and carotenoid content and visual quality of baby spinach (*Spinacia oleracea* L.). *Journal of the Science of Food and Agriculture*. 2006 Feb;86(3):346-55.
11. Bito T, Okumura E, Fujishima M, Watanabe F. Potential of *Chlorella* as a dietary supplement to promote human health. *Nutrients*. 2020 Sep;12(9):2524.
12. Agricultural Research Service (ARS), FoodData Central, Seaweed, spirulina, dried - <https://fdc.nal.usda.gov/food-details/170495/nutrients>. Visited February 2026.
